# Supplementary material for: Beyond Axillary Lymph Node Metastasis, BMI and Menopausal Status Are Prognostic Determinants for Triple-Negative Breast Cancer Treated by Neoadjuvant Chemotherapy
Source: PubMed Central journal article supplement (PMC4686172; doi:10.1371/journal.pone.0144359), 2015-12-18

**Figure S1.** Histograms of time between diagnosis and start of neoadjuvant chemotherapy, and overall, metastasis-free, and relapse-free survival curves in the NEOREP Cohort.

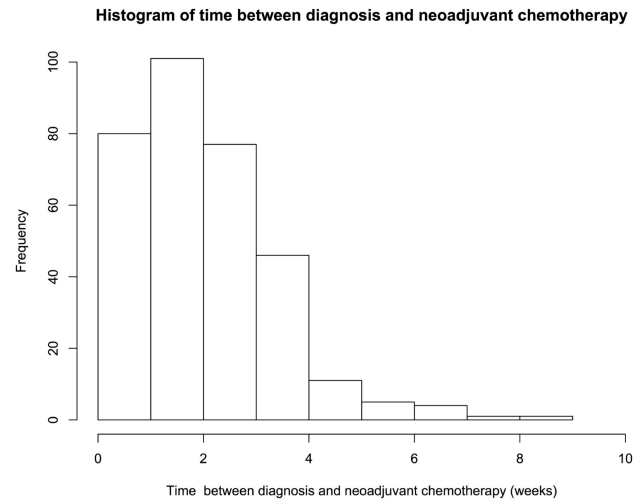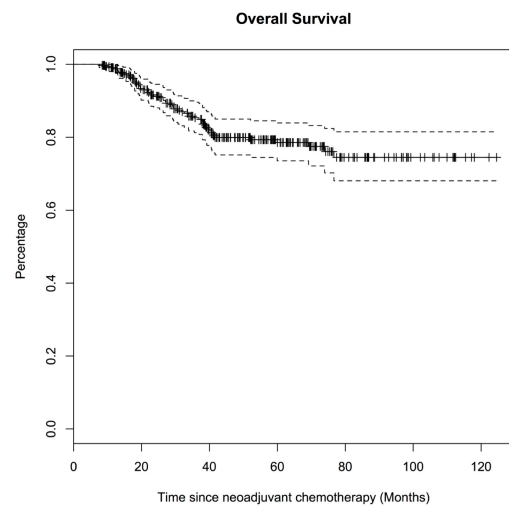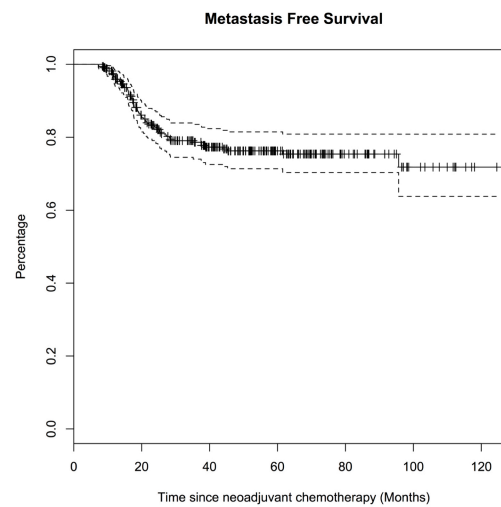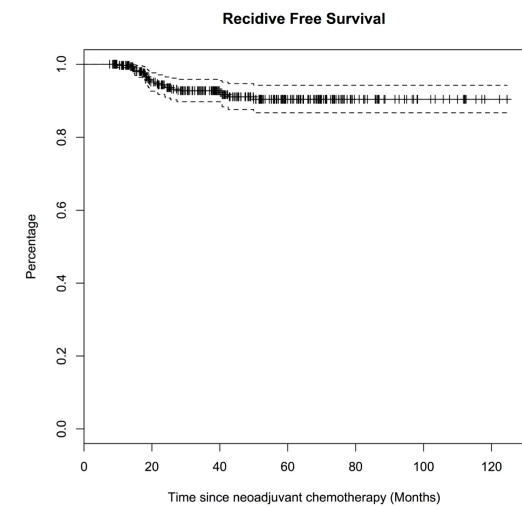

Supplement: pone.0144359.s001.pdf [file pone.0144359.s001.pdf]
